# Supplementary material for: Robustness and accuracy improvement of data processing with 2D neural networks for transient absorption dynamics
Source: Royal Society of Chemistry journal article supplement (doi:10.1039/d1cp02521j), 2021-01-01
Supplement: d1cp02521j1.pdf [file d1cp02521j1.pdf]

## Supporting Information: Robustness and Accuracy Improvement of Data Processing with 2D Neural Network for Transient Absorption Dynamics

Ruixuan Zhao<sup>a, ‡</sup>, Daxin Wu<sup>a, ‡</sup>, Jiao Wen<sup>b</sup>, Qi Zhang<sup>c</sup>, Guanglei Zhang<sup>a</sup>, Jiebo Li<sup>a\*</sup>

<sup>a</sup> *Institute of Medical Photonics, Beijing Advanced Innovation Center for Biomedical Engineering,  
School of Biological Science and Medical Engineering, Beihang University, Beijing 100191, P.R.  
China*

<sup>b</sup> *School of Materials Science and Engineering Beihang University Beijing 100191, China*

<sup>c</sup> *State Key Laboratory of Molecular Reaction Dynamics Dalian Institute of the Chemical Physics  
Chinese Academy of Sciences Dalian, Liaoning 116023, China*

\* [jiebo39@buaa.edu.cn](mailto:jiebo39@buaa.edu.cn);

‡ These authors contribute equally to this work.

Including Fig. S1-3.

### S1 Training set generation for 1DCNN

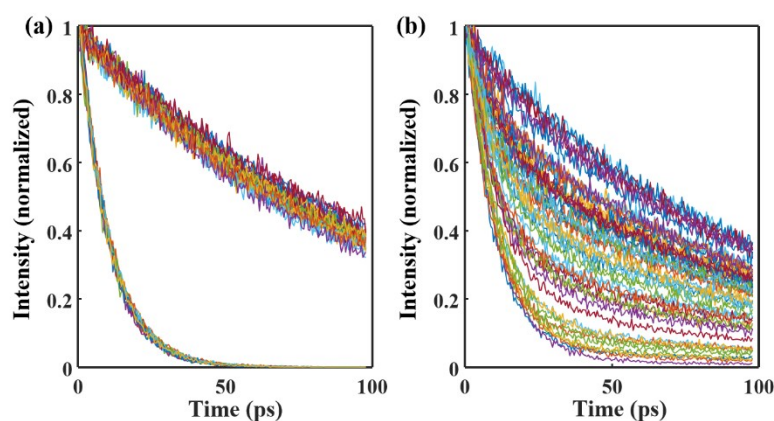

**Fig. S1 (a)Generated single exponential training sample for 1DCNN. (b)Generated bi-exponential training sample for 1DCNN.**

To obtain well trained model and achieve effective classification of exponential form for decay process, both single exponential decay and bi-exponential decay (Fig. S1(b)) were simulated in the form of Eq. 8 with addition of Poisson noise. Overall, 150 sets of spectrum were simulated in which

each spectrum had 100 wavelength units. Furthermore, to promise the balance of different exponential forms in a training sample, different exponential decay was generated randomly (50% bi-exponential decay, 50% single-exponential decay) in a spectrum and the lifetime distribution was also determined randomly ( $\mu = 10$  ps or  $\mu = 100$  ps) in a single exponential decay (Fig. S1(a)). Specifically, in a bi-exponential decay, the amplitude fraction in Eq. 8 was set as a random number ranging from 0 to 1 so that effective sampling between two lifetime distribution could be achieved and the training effectiveness could be promised.

## **S2 Training set generation for highly noised data**

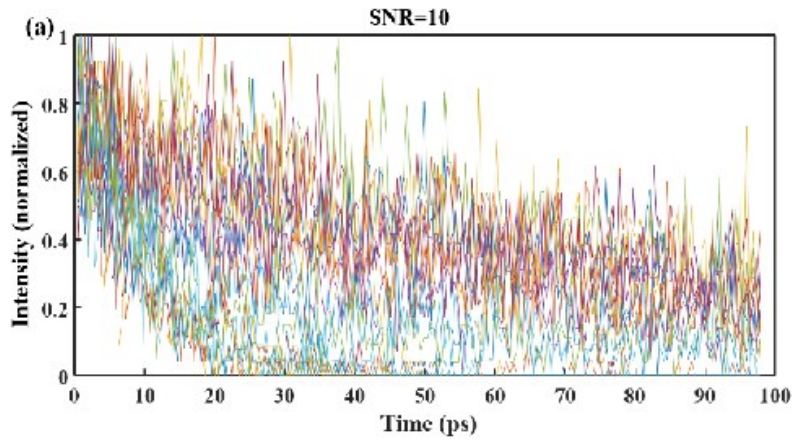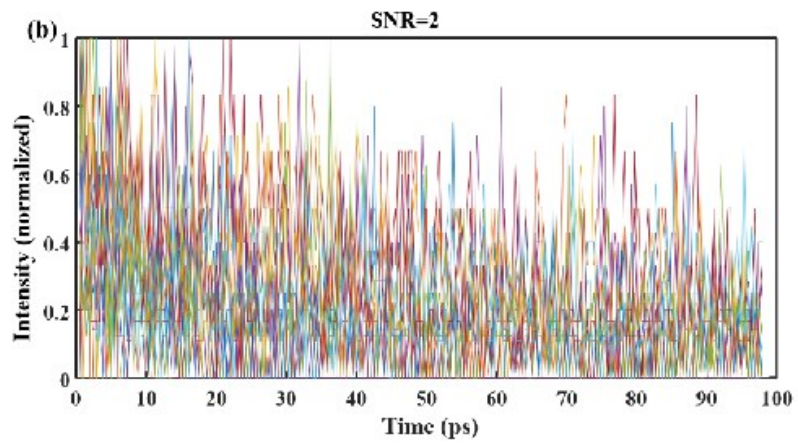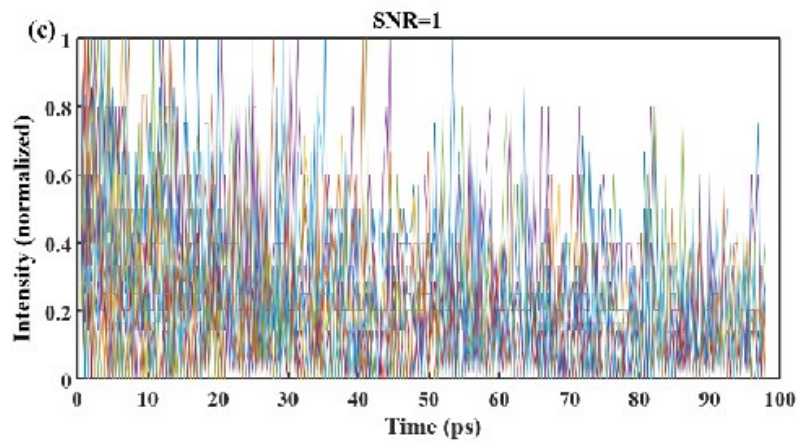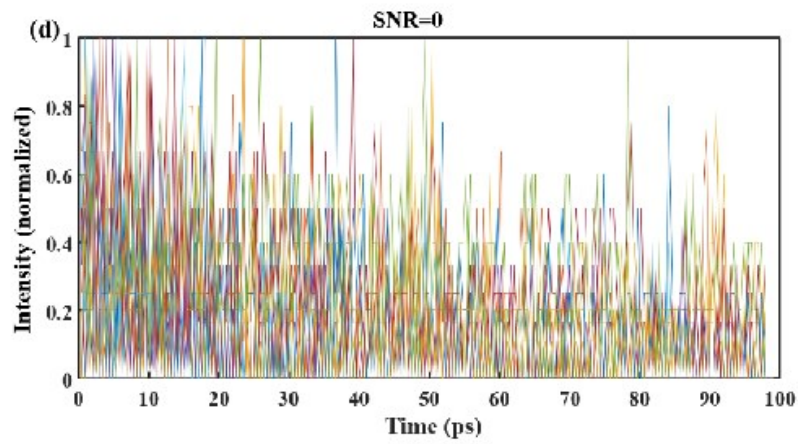

**Fig. S2 Generated highly noised data sample with (a) SNR = 10, (b) SNR = 2, (c) SNR = 1, (d) SNR = 0.**

First, to characterize the noise background, signal to noise ratio (SNR) was defined as

$$10 \lg \frac{P_{signal}}{P_{noise}} \text{ (dB)}, \text{ and } P_{signal} \text{ was calculated from } \frac{1}{N} \sum_{i=1}^N x[n]^2$$

, where  $x[n]$  stands for sampling points in exponential decay without noised background, so as the calculation process of  $P_{noise}$ . As shown in Fig. S2, to test the robustness of our algorithm under highly noised data, 150 sets of spectrum were simulated respectively with different SNR (SNR = 0, SNR = 1, SNR = 2, SNR = 10). Furthermore, all the decay curves were simulated using Eq. 8 in biexponential form with life time in different distributions ( $t_1: \mu = 10 \text{ ps}, \sigma = 0.5, t_2: \mu = 100 \text{ ps}, \sigma = 5, A_1: \mu = 0.2, \sigma = 0.1$ ), and the amplitude fraction  $A_1$  was set as a random number ranging from 0 to 1 to promise impartial sampling.

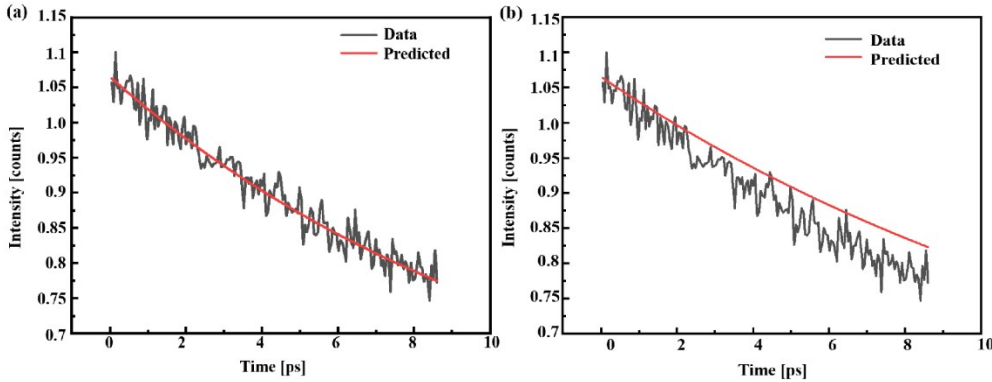

**Fig. S3 Generated exponential decay and the prediction of lasso with different resolution  $\omega$  (a) 3.5, (b) 3.6.**

During exponential sampling process characterized by  $\Gamma_k = \Gamma_0 \exp(k\pi/\omega)$ , even  $\Gamma_0$  could be fixed according to the limitation of detecting range of experimental instrument for specific task, the determination of resolution  $\omega$  could still be an onerous task. As shown in Fig. S3(a),  $\Gamma_0$  was set to 0.001 and  $\omega$  was set to 3.5, as comparison,  $\Gamma_0$ ,  $\omega$  was set to 0.001 and 3.6 in Fig. S3(b). We could obviously differentiate that  $\omega = 3.5$  enables better fitting to the simulated decay curve. However, there only exists 1% discrepancy in  $\omega_1$  and  $\omega_2$ , which indicates that  $\omega$  possesses a relatively rugged solution space and it is arduous to search the reasonable resolution

artificially.
